1 **Elimusertib outperforms standard of care chemotherapy in preclinical**  
2 **patient-derived pediatric solid tumor models**

3 Fabian Pusch<sup>1,2#</sup>, Heathcliff Dorado García<sup>1,2#</sup>, Robin Xu<sup>1,2</sup>, Dennis Gürgen<sup>3</sup>, Yi Bei<sup>1,2</sup>,  
4 Lotte Brueckner<sup>1,4</sup>, Claudia Röefzaad<sup>1,2</sup>, Jennifer von Stebut<sup>1,2</sup>, Victor Bardinet<sup>1,2</sup>, Rocío  
5 Chamorro González<sup>1,2</sup>, Angelika Eggert<sup>2</sup>, Johannes H. Schulte<sup>2</sup>, Patrick Hundsdörfer<sup>2,5</sup>,  
6 Georg Seifert<sup>2</sup>, Kerstin Haase<sup>1</sup>, Beat Schaefer<sup>6</sup>, Marco Wachtel<sup>6</sup>, Anja A. Kühl<sup>7</sup>, Michael  
7 V. Ortiz<sup>8</sup>, Antje M. Wengner<sup>9</sup>, Monika Scheer<sup>2</sup>, Anton G. Henssen<sup>1,2,4,10,11\*</sup>

8 Affiliations:

9 <sup>1</sup>Experimental and Clinical Research Center (ECRC) of the MDC and Charité Berlin,  
10 Berlin, Germany.

11 <sup>2</sup>Department of Pediatric Oncology and Hematology, Charité – Universitätsmedizin  
12 Berlin, corporate member of Freie Universität Berlin, Humboldt-Universität zu Berlin,  
13 Berlin, Germany.

14 <sup>3</sup>Experimental Pharmacology and Oncology (EPO), Berlin, Germany.

15 <sup>4</sup>Max-Delbrück-Centrum für Molekulare Medizin (BIMSB/BIH), Berlin, Germany.

16 <sup>5</sup>Helios Klinikum Berlin-Buch, Berlin, Germany.

17 <sup>6</sup>University Children's Hospital, Zurich, Switzerland.

18 <sup>7</sup>iPATH.Berlin – Core Unit Immunopathology for Experimental Models, Charité Berlin,  
19 corporate member of Freie Universität Berlin, Humboldt-Universität zu Berlin, Berlin,  
20 Germany

21 <sup>8</sup>Department of Pediatrics, Memorial Sloan Kettering Cancer Center, New York City,  
22 NY, USA.

23 <sup>9</sup>Bayer AG, Berlin, Germany.

24 <sup>10</sup>Berlin Institute of Health, 10178 Berlin, Germany.

25 <sup>11</sup>German Cancer Consortium (DKTK), partner site Berlin, and German Cancer Research  
26 Center (DKFZ), Heidelberg, Germany.

27

28 <sup>#</sup>These authors contributed equally.

29 \*These authors jointly supervised this work. Correspondence should be addressed to  
30 A.G.H. ([henssenlab@gmail.com](mailto:henssenlab@gmail.com)).

31

32 **Running title.** Elimusertib has antitumor activity in pediatric solid tumors

33

34 **Keywords.** Pediatric oncology, ATR inhibitor, Rhabdomyosarcoma, Neuroblastoma,  
35 Patient-derived xenograft.

36

37 **Additional information.**

38 Financial support:

39 A.G.H.:

- 40 o *Deutsche Forschungsgemeinschaft* (DFG, German Research Foundation)
- 41 o – 398299703
- 42 o *Wilhelm Sander Stiftung*
- 43 o Charité 3R, Charité - Universitätsmedizin Berlin.
- 44 o German Cancer Consortium (DKTK).
- 45 o BIH-Charité Clinical Scientist Program funded by the Charité –
- 46 *Universitätsmedizin Berlin*
- 47 o Research funding by Bayer AG
- 48 o European Research Council (ERC) under the European Union’s Horizon
- 49 2020 research and innovation programme (grant agreement No. 949172).
- 50 o A.G.H. is supported by the Deutsche Krebshilfe (German Cancer Aid)
- 51 Mildred Scheel Professorship program – 70114107.
- 52 o This project received funding by the NIH/CRUK (398299703, the
- 53 eDynamic Cancer Grand Challenge).

54 H.D.G.:

- 55 o Fellowship by “la Caixa” foundation (LCF/BQ/EU18/11650037)

56 A.M.W.:

- 57 o Employed by Bayer AG

58

59 Corresponding author:

60 Full name: Prof. Dr. med. Anton George Henssen

61 Email address: [henssenlab@gmail.com](mailto:henssenlab@gmail.com), [anton.henssen@charite.de](mailto:anton.henssen@charite.de)

62 Phone number: +49 30 450 540395

63 Fax number: +49 30 450 566906

64 Conflict of interest disclosure statement:

65 A.M.W. is employed by Bayer AG.

66 A.G.H. has received research funding from Bayer AG and is a founder and  
67 shareholder of AMZL Therapeutics

68 Manuscript indices

|    |                                                            |      |
|----|------------------------------------------------------------|------|
| 69 | • Word count - Statement of transl. rel.:                  | 113  |
| 70 | • Word count - Abstract:                                   | 134  |
| 71 | • Word count - Main text (Introduction/Results/Discussion) | 4218 |
| 72 | • Number of figures:                                       | 6    |
| 73 | • Number of tables:                                        | 0    |
| 74 | • Number of references:                                    | 64   |

75 **Statement of translational relevance**

76 Elimusertib is a small molecule inhibitor of ATR. ATR inhibitors have shown promising  
77 results as anticancer agents in adult cancers, but there is limited information on their  
78 effectiveness in pediatric solid tumors. Using a cohort of 32 patient-derived xenografts  
79 from pediatric solid tumors, we here evaluated the therapeutic potential of elimusertib *in*  
80 *vivo*. Elimusertib reduced tumor volume growth in all samples. Elimusertib had very  
81 limited toxicity and was potent even in tumors with preexisting chemoresistance. Our  
82 preclinical data indicates that elimusertib is a safe and potent therapeutic option for  
83 pediatric solid tumors. This data may serve as a rationale for the development of pediatric  
84 clinical trials for ATR inhibitors.

85 **Abstract**

86 The small molecule inhibitor of ataxia telangiectasia and Rad3-related protein (ATR),  
87 elimusertib, is currently being tested clinically in various cancer entities in adults and  
88 children. Its preclinical anti-tumor activity in pediatric malignancies, however, is largely  
89 unknown. We here assessed the preclinical activity of elimusertib in >40 cell lines and  
90 >30 patient-derived xenograft (PDX) models derived from common pediatric solid tumor  
91 entities. Detailed *in vitro* and *in vivo* molecular characterization of the treated models  
92 enabled the evaluation of response biomarkers. Pronounced objective response rates were  
93 observed for elimusertib monotherapy in PDX, when treated with a regimen currently  
94 used in clinical trials. Strikingly, elimusertib outperformed standard of care  
95 chemotherapies, particularly in alveolar rhabdomyosarcoma PDX. Thus, elimusertib has  
96 strong preclinical anti-tumor activity in pediatric solid tumor models, which may translate  
97 to clinically meaningful responses in patients.

## 98 **Introduction**

99 Pediatric cancers are rare but represent a leading cause of death in children (1). Currently,  
100 pediatric solid tumors are treated with a histology-specific and risk-stratified combination  
101 of surgery, radiotherapy, and chemotherapy. Despite steady improvements in the survival  
102 rate of childhood cancers over the last several decades (2), cures remain unacceptably low  
103 for many high risk pediatric solid tumors. Even for those who are ultimately cured, the  
104 aggressive multi-modality approaches are frequently associated with severe long-term  
105 morbidities (3). As a result, there is an urgent need to identify novel therapeutic  
106 approaches, which leverage specific tumor vulnerabilities.

107 Compared to adult cancers, which often demonstrate high numbers of mutations  
108 accumulated over a lifetime, pediatric tumors generally arise during developmental  
109 windows in a tissue-context specific manner, often harboring only few mutational drivers  
110 and a low mutational burden (4). A common feature among pediatric solid tumors is the  
111 presence of fusion oncoproteins, which emerge as a result of chromosomal aberrations  
112 (5). Additionally, intra- and extrachromosomal oncogene amplifications are frequent in  
113 certain pediatric solid tumors, such as in neuroblastoma, where *MYCN* amplifications,  
114 often occurring on ecDNA, are a predictor for poor prognosis (6-10). Both gene  
115 amplifications and fusion oncoproteins are hard to therapeutically target directly,  
116 particularly when affecting transcription factors, which has hampered the development of  
117 selective therapies in these tumor entities.

118 Genomic instability is a hallmark of cancer cells (11), which has recently been shown to  
119 be therapeutically actionable (12). The extreme proliferation rate in cancer cells, in part  
120 induced by fusion oncoproteins and oncogene amplifications, can result in delays or  
121 errors in the DNA termed replication stress (13-15). In response to the damaged DNA,  
122 cells have intricate mechanisms to recognize and repair lesions while ensuring that the

123 cell cycle is halted, termed the DNA damage response (DDR). The DDR is mainly  
124 regulated by three kinases: ataxia telangiectasia mutated (ATM), ataxia telangiectasia-  
125 and Rad3-related (ATR), and DNA-dependent protein kinase catalytic subunit (DNA-  
126 PKcs) (16). Even though they have similar protein sequences, and their targets overlap, it  
127 is widely accepted that they respond to different stimuli (17). While ATM and DNA-  
128 PKcs are mostly activated after double strand breaks (DSBs), ATR responds primarily to  
129 replication stress-associated DNA damage, which often involves single stranded DNA  
130 intermediates (18,19). Because ATR is activated in response to replication stress, it has  
131 been suggested that cancers depend on ATR more strongly than non-transformed cells to  
132 tolerate high levels of replication stress (20,21). These findings have fueled the interest  
133 to test ATR inhibitors as a therapeutic option in cancer, particularly in tumors with high  
134 replication stress. Some biomarkers for predicting ATR inhibitor response have been put  
135 forward, e.g. ATM loss, TP53 loss, MYC overexpression, CDC25A overexpression,  
136 PGBD5 expression and fusion oncoproteins such as EWS-FLI1 and PAX3-FOXO1,  
137 which increase sensitivity to ATR inhibitors (22-30) and are currently considered in  
138 clinical trial design (NCT04095273, NCT03188965, NCT03682289, NCT04170153,  
139 NCT04576091, NCT04535401, NCT04657068, NCT05338346, NCT04616534,  
140 NCT04514497, NCT05071209). How most pediatric solid tumor entities may benefit  
141 from ATR inhibitor treatment is difficult to predict, as detailed preclinical information is  
142 currently missing.

143 Here we profiled the anti-tumor effects of the ATR inhibitor elimusertib (also known as  
144 BAY 1895344) *in vitro* and in a cohort of PDXs from pediatric solid tumors. In order to  
145 create a solid basis for future clinical trial designs, we compared the effects of elimusertib  
146 to those of first-line standard-of-care (SoC) chemotherapeutics. We demonstrate that  
147 monotherapy with elimusertib has most pronounced antiproliferative effects in models of

148 alveolar rhabdomyosarcoma and neuroblastoma, and identify specific molecular  
149 alterations that may predict response to elimusertib. These findings highlight a potential  
150 therapeutic role for ATR inhibition in a subset of childhood solid tumors and provide a  
151 basis to accelerate the translation into meaningful clinical applications.

152

## 153 **Materials and Methods**

### 154 *Study design*

155 The purpose of this study was to examine the effects of ATR inhibition in preclinical  
156 models of pediatric solid tumors and identify potential biomarkers to select patients that  
157 could benefit from a treatment with the ATR inhibitor elimusertib. We first determined  
158 the inhibitory activity of the elimusertib in cell models, and compared these cells based  
159 on known determinants of ATR inhibition sensitivity, as well as the presence of  
160 oncogenes which increase the level of replication stress. We analyzed the effects of  
161 elimusertib treatment on cell cycle control and genomic instability. All *in vitro*  
162 experiments were performed following the guidelines proposed by Carola A.S. Arndt for  
163 pediatric tumors (31). In the study, five to eight cell lines were used per disease, for which  
164 we validated the expression of the target genes and included the elimusertib IC<sub>50</sub> after  
165 72h. Outliers were not excluded unless technical errors were present. For *in vivo* testing,  
166 sample size was decided based on previous experience with the models. Animals  
167 euthanized before the end of the experiment, due to excessive tumor growth or loss of  
168 body weight, were included in the analysis. The researchers and patients were not blinded  
169 during the experiments.

170

### 171 *Reagents*



172 All reagents were obtained from Carl Roth (Karlsruhe, Germany) unless otherwise  
173 indicated. Elimusertib was provided by Bayer AG (Leverkusen, Germany). Elimusertib  
174 was dissolved in dimethyl sulfoxide (DMSO) and stored at 10 mM concentrations at -20  
175 °C until further use.

176

### 177 ***Cell culture***

178 All neuroblastoma and Ewing sarcoma cell lines were kindly provided by Prof. J.H.  
179 Schulte (Charité). Rh41, Kym1 and Rh18 cells were a kind gift from Prof. Simone Fulda  
180 (Kiel, Germany). The remaining human tumor cell lines were obtained from the American  
181 Type Culture Collection (ATCC, Manassas, Virginia). All rhabdomyosarcoma and all  
182 Ewing's sarcoma cell lines, as well as RPE and BJ cell lines were cultured in Dulbecco's  
183 Modified Eagle's Medium (DMEM, Gibco, Thermo Fisher Scientific, Waltham,  
184 Massachusetts, USA) supplemented with 10% fetal calf serum (Thermo Fisher) and  
185 penicillin/streptomycin (Gibco, Thermo Fisher Scientific). All neuroblastoma cell lines  
186 were cultured in Roswell Park Memorial Institute (RPMI)-1640 (Gibco, Thermo Fisher  
187 Scientific) supplemented with 10% fetal calf serum and penicillin/streptomycin. Twice  
188 per week, cells were washed with phosphate-buffered saline (PBS), incubated in 0.05%  
189 Trypsin-EDTA (1x) (Gibco, Thermo Fisher Scientific) for five minutes, resuspended in  
190 culture medium, sedimented at 500 g for 5 minutes and a fraction was cultured in fresh  
191 media. Cells were kept in culture for a maximum of 30 passages. Resuspended cells were  
192 counted by mixing 1:1 with 0.02 % trypan blue in a BioRad (Hercules, CA, USA) TC20  
193 cell counter. The absence of *Mycoplasma sp.* contamination was determined using a  
194 Lonza (Basel, Switzerland) MycoAlert system.

195

196 ***Cell viability***

197 Cell viability was assessed using CellTiter-Glo (Promega, Madison, Wisconsin, USA).  
198 Briefly, for CellTiter-Glo measurement, 1,000 cells were seeded in white, flat-bottom,  
199 96-well plates (Corning, Corning, NY, USA). After 24 hours, drugs were added to the  
200 medium and cells were incubated for 72 hours. CellTiter-Glo luminescent reagent was  
201 added according to the manufacturers protocol, and the luminescence signal measured on  
202 a Glowmax-Multi Detection System (Promega).

203

204 ***Western Immunoblotting***

205 Whole-cell protein lysates were prepared by lysing cells in Radioimmunoprecipitation  
206 assay buffer (RIPA) supplemented with cOmplete Protease inhibitor (Roche, Basel,  
207 Switzerland) and PhosphStop (Roche). Protein concentrations were determined by  
208 bicinchoninic acid assay (BCA, Thermo Fisher). 10 µg of protein were denatured in  
209 Laemmli buffer at 95 °C for 5 minutes. Lysates were loaded onto 16%, or 10% Tris-  
210 Glycin (Thermo Fisher) gels for gel electrophoresis depending on the protein sizes of  
211 interest. Proteins were transferred onto Polyvinylidenfluorid (PVDF) membranes  
212 (Roche), blocked with 5% dry milk or 5% bovine serum albumin for 1 hour and incubated  
213 with primary antibodies overnight at 4°C, then secondary antibodies for 1 hour at room  
214 temperature. Chemiluminescent signal was detected using Enhanced chemiluminescence  
215 (ECL) Western Blotting Substrate (Thermo Fisher) and a Fusion FX7 imaging system  
216 (Vilber Lourmat, Marne-la-Vallée, France). Quantification was performed with ImageJ.

217

218 ***Immunofluorescence staining***

219 Cells were grown at the desired confluency on glass slides with an 8 well flexiPERM  
220 silicone grid (Sarstedt, 94.6032.039) for 24h and directly processed (for R-loop  
221 quantification) or treated with 20 nM elimusertib for 48 h (micronuclei quantification).  
222 Cells were washed with PBS three times and fixed for 10 minutes with 3.7 %  
223 paraformaldehyde, washed with PBS three times and permeabilized with PBS containing  
224 0.1% Triton-X100. For R-loop immunofluorescence cells were blocked for 30 minutes  
225 with 10% FCS in PBS-T (0.2% Tween-20 in PBS), incubated overnight at 4°C with the  
226 primary antibody (Anti-DNA-RNA Hybrid Antibody, clone S9.6; Merck Millopore  
227 MABE1095), washed three times with PBS-T (0.05% Tween-20 in PBS), incubated for  
228 1 hour in the dark at room temperature with the secondary antibody (Dianova, 715-096-  
229 150). After removal of the 8 well silicone grid, the glass slide was washed three times  
230 with PBS-T (both R-loop and micronuclei quantification). The glass slide was covered  
231 with DAPI-containing mounting media (Vectashield, Vec-H-1000) and mounted with a  
232 cover slip. Cells were imaged using an ECHO Revolve microscope and quantified using  
233 ImageJ.

234

### 235 ***Fluorescence-activated cell sorting (FACS)***

236 Cells were grown in the presence of drug or vehicle (DMSO) for 72h prior to sample  
237 preparation for flow cytometry. For cell cycle analysis, cells were incubated with 5-  
238 Ethynyl-2'-deoxyuridine (EdU) for 2 hours right before fixation and fluorescent labeling,  
239 following the instructions provided in the kit Click-IT EdU Alexa Fluor 488 Flow  
240 Cytometry Assay kit (Thermo Fisher). For DNA damage analysis, terminal  
241 deoxynucleotidyl transferase dUTP nick end labeling (TUNEL) was performed using the  
242 APO-BrdU TUNEL Assay Kit (Thermo Fisher), according to the manufacturer's

243 descriptions. Stained cells were measured on a BD LSR Fortessa flow cytometer (BD  
244 Biosciences, Franklin Lakes, NJ, USA) and analyzed using FlowJo (v 10.8.1).

245

#### 246 ***Patient-derived xenograft (PDX) treatment***

247 The establishment of PDX models was conducted as previously described (32) in  
248 collaboration with Experimental Pharmacology & Oncology GmbH (EPO, Berlin,  
249 Germany). All experiments were conducted according to the institutional animal  
250 protocols and the national laws and regulations. Tumor fragments from  
251 rhabdomyosarcoma patients were transplanted into either Crl:NMRI-*Foxn1*<sup>tm</sup> mice  
252 (Charles River, Wilmington, MA, USA) or NOD.Cg-Prkdc<sup>scid</sup> Il2rg<sup>tm1Sug</sup>/JicTac mice  
253 (Taconic, Rensselaer, NY, USA). Tumor growth was monitored with caliper  
254 measurements. Tumor volume was calculated with the formula length x width<sup>2</sup> / 2. PDX  
255 were serially transplanted in mice at least three times prior to the experiments. Mice were  
256 randomized into four groups with at least 3 mice to receive treatment. For the elimusertib  
257 study, mice were administered 40 mg/kg body weight on a 3 days on/4 days off regime  
258 twice daily (orally). Elimusertib was dissolved in 60% polyethylene glycol 400, 10%  
259 ethanol and 30% water to a 4mg/ml solution, the same solution without compound was  
260 used as vehicle control. Mice were sacrificed by cervical dislocation once the tumor  
261 volume exceeded 1.500 mm<sup>3</sup> or body weight loss was higher than 20%.

262

#### 263 ***Immunohistochemistry stainings***

264 Paraffin sections of 1 µm thickness were cut, dewaxed and subjected to a heat-induced  
265 epitope retrieval step. Endogenous peroxidase was blocked by hydrogen peroxide prior  
266 to incubation with anti-Ki67 (clone D2H10, Cell Signaling Technologies), anti-Histone

267 H3-S10 (polyclonal rabbit, Abcam #47297) or anti- $\gamma$ H2AX (polyclonal rabbit, Abcam  
268 #229914) followed by incubation with EnVision+ HRP-labelled polymer (Agilent). For  
269 visualization, 3,3'-diaminobenzidine (DAB) as chromogen was used. For detection of  
270 cleaved caspase3, anti-clCasp3 (clone 5A1E, Cell Signaling Technologies) was used  
271 followed by incubation with secondary antibody (biotinylated donkey anti-rabbit) and  
272 alkaline phosphatase-labelled streptavidin (Agilent). RED was used as chromogen  
273 (Agilent). Nuclei were stained with hematoxylin (Merck) and slides were coverslipped in  
274 glycerol gelatine (Merck). Multispectral images were acquired using a Vectra<sup>®</sup> 3 imaging  
275 system (Akoya Biosciences). The QuPath software (version 0.3.2) was used for cell  
276 segmentation as well as quantification.

277

#### 278 *Cell line and PDX genomic analysis*

279 Cell line mutation data was obtained from the online public dataset DepMap  
280 (<https://depmap.org/portal/>, packages Copy Number Public 21Q2 and Mutation Public  
281 21Q2). WGS, WES and RNA sequencing from the PDX samples was performed using  
282 NEBNext Ultra II FS DNA library Kit for Illumina (New England Biolabs),  
283 SureSelectXT HS Target Enrichment System for Illumina Paired-End Multiplexed  
284 Sequencing Library For Illumina Multiplexed Sequencing Platforms (Agilent), and  
285 TruSeq Stranded mRNA Library Prep (New England Biolabs), respectively, following  
286 the protocol provided by the manufacturers. Oncoplots were drawn using the R package  
287 maftools (v 2.12.0).

288

#### 289 *Statistical analysis*

290 All statistical tests were done using GraphPrism9 or R.

291

292 ***Data availability:***

293 The data generated in this study are available upon request from the corresponding author.

294 Restrictions apply to the availability of data that does not comply with patient privacy  
295 requirements.

296

297 **Results**

298 ***Elimusertib treatment affects survival of pediatric solid tumor cell lines***

299 To study the therapeutic potential of elimusertib inhibition in pediatric solid tumors, we  
300 treated 41 cell lines derived from several pediatric tumors, including Ewing's sarcoma  
301 (EWS), alveolar (ARMS) and embryonal rhabdomyosarcoma (ERMS) and high-risk  
302 neuroblastoma with and without *MYCN* amplification (MNA NB vs. NMNA NB), with  
303 the ATR inhibitor elimusertib and measured their survival over time (Fig. 1a-e). Cells  
304 showed a wide range of response, with inhibitory 50% concentrations ( $IC_{50}$ ) values  
305 ranging from 2.687 to 395.7 nM (Extended Data Table 1). These concentrations are well  
306 below plasma concentrations achievable in human patients (33), suggesting that  
307 elimusertib may exert similar anti-tumor effects *in vivo*. Compared to non-transformed  
308 cell lines BJ and RPE cells, elimusertib inhibited cell viability at lower concentrations in  
309 most cancer cell lines (Fig. 1f). In line with previous reports testing other ATR inhibitors  
310 (24,26,29), cell lines derived from Ewing sarcoma, *MYCN*-amplified neuroblastoma and  
311 alveolar rhabdomyosarcoma were (significantly) more sensitive to ATR inhibition than  
312 control cell lines, suggesting a therapeutic window may exist for elimusertib in these  
313 pediatric solid tumors.

314

315 ***Elimusertib treatment leads to DNA damage in pediatric solid tumor cell lines***

316 ATR is a key regulator of replication stress-induced DNA damage (18,34,35). To  
317 investigate the effects of ATR inhibition in pediatric cancer cell lines, we measured DNA  
318 damage accumulation in response to elimusertib treatment in a subset of cell lines.  
319 Micronucleation is an indicator of genomic instability (36). In response to elimusertib,  
320 cell lines showed higher rates of micronucleation (Fig. 1g-h), indicating the presence of  
321 DNA damage. Co-staining with TdT-dependent UTP nicked-end labelling (TUNEL) and  
322 propidium iodide indicated an increase in the fraction of cells with fragmented DNA in  
323 cells incubated with elimusertib, suggesting an accumulation of unrepaired damaged  
324 DNA and apoptotic DNA fragmentation (Fig. 1i-j), which is in line with previous reports  
325 (26,29,33,37,38). Because ATR is crucial for the intra-S and G2/M checkpoint activation  
326 (39-41), we examined cell cycle progression in response to elimusertib. We pulse-labelled  
327 replicating DNA with 5-Ethynyl-2'-Desoxyuridin (EdU) and stained all DNA with  
328 propidium iodide in cells incubated in the presence of elimusertib. In all cell lines tested,  
329 elimusertib led to a reduction in the fraction of cells in S-phase, consistent with a  
330 repression of the intra-S checkpoint. In all cell lines but one (IMR-5/75), we observed an  
331 increase in cells in G2/M (Figure 1k-l). To assess whether cells accumulated in mitosis,  
332 consistent with a G2/M checkpoint suppression, we measured Histone 3 phosphorylation  
333 at Serine 10, a marker specific for mitosis (42). After incubation in the presence of  
334 elimusertib, we did not observe a consistent increase in IMR-5/75 (neuroblastoma) and  
335 A4573 (Ewing sarcoma) cells, suggesting cell context dependent cell cycle disruption in  
336 response to elimusertib (Extended Data Fig. 1a-b). We next evaluated the effect of  
337 elimusertib on replication stress by measuring RPA32 T21 phosphorylation, in cells  
338 incubated with elimusertib. RPA32 phosphorylation, a marker of single-stranded DNA,  
339 was increased in response to elimusertib (Extended Data Fig. 1a-b). Taken together, this

340 suggests that elimusertib prevents repair of replication stress-associated DNA damage,  
341 resulting in further genomic instability and then ultimately apoptosis in these pediatric  
342 solid tumor cell line models.

343

344 ***Fusion oncoprotein expression and high MYCN levels are associated with elimusertib***  
345 ***sensitivity***

346 Because ATR is key in repairing replication stress-induced DNA damage, we tested  
347 whether cell lines with varying levels of ATR-mediated replication stress response  
348 signaling would differ in their sensitivity to elimusertib. For this purpose, we assessed the  
349 abundance of R-loops, a nucleic acid structure consisting of and RNA:DNA hybrid and  
350 single stranded DNA which has been implicated in genomic instability as well as  
351 replication stress and is being discussed as mediator for treatment susceptibility in cancer  
352 (43,44). In contrast to previous reports, no positive correlation was observed between the  
353 abundance of R-loops and elimusertib sensitivity (Extended data fig. 2a-c). Sensitivity to  
354 ATR inhibitors can be influenced by genetic aberrations frequent in cancers, such as TP53  
355 or ATM loss, PGBD5, MYC(N) expression, or fusion oncoproteins such as EWS-FLI1  
356 and PAX3-FOXO1 (22,24-27,29,45). We assessed the presence of frequent genetic  
357 alterations in pediatric tumors (46) as well as markers that cause genetic vulnerability to  
358 ATR inhibition (22,25,27,28,47,48) in our cell lines using publicly available datasets  
359 (49). In line with previous reports (28), the presence of *MYCN* amplifications, both on  
360 ecDNA or as homogenously staining regions (50,51), in NB cell lines, expression of  
361 fusion oncoproteins such as EWS-FLI1 or PAX3-FOXO1 (25,29) and TP53 deficiency  
362 (22) were associated with higher elimusertib sensitivity (Fig. 1m). Thus, the presence of  
363 known biomarkers of ATR inhibitor sensitivity is also associated with elimusertib



364 sensitivity in pediatric tumor cell lines and may be suitable for patient selection in current  
365 and upcoming clinical trials.

366

367 ***A preclinical trial of elimusertib in patient-derived xenografts demonstrates clinically***  
368 ***relevant response in a large subset of pediatric solid tumors***

369 Encouraged by the results obtained *in vitro*, we sought to test the preclinical anti-tumor  
370 activity of elimusertib *in vivo* in mice harboring patient-derived xenograft models (PDX)  
371 of pediatric solid tumors (Fig. 2a). We selected a cohort of PDX derived from 8 EWS, 4  
372 ERMS, 7 ARMS, 4 MNA-NB, 5 NMNA-NB, 3 osteosarcomas (OS) and one CIC-DUX  
373 fusion gene expressing undifferentiated sarcoma. Within each entity, the cohort  
374 comprised various sites of origin, primary or relapse status, histopathological gradings  
375 and clinical stagings (Extended Data Table 2). In total, we treated 195 mice (median 3  
376 mice per PDX model and treatment arm) and 32 PDX models derived from patients  
377 treated at the Charité – Universitätsmedizin Berlin (Xu et al., currently under  
378 consideration elsewhere) and the University Children's Hospital, Zurich (52). Some PDX  
379 were derived from the same tumors but collected before and after treatment (EWS\_3a and  
380 EWS\_3b) or sequential relapses (ERMS\_2a, ERMS\_2b and ERMS\_2c) (Extended Data  
381 Table 2). In order to closely mirror the setup of a clinical trial, we treated mice using the  
382 same regimen currently used in clinical trials, i.e. elimusertib at 40 mg/kg body weight  
383 twice daily per oral gavage, on a 3-days on/4-days off schedule for 28 days (Fig. 2a).  
384 According to the Response Evaluation Criteria in Solid Tumours (RECIST) (53,54), two  
385 of the PDX models achieved a complete response (CR), two PDX had a partial response  
386 (PR), 14 PDX were considered as stable disease (SD), and 16 PDX were classified as  
387 progressive disease (PD, Fig. 2b-d). In all cases, single agent elimusertib treatment was  
388 sufficient to significantly delay tumor growth, compared to vehicle-treated control mice

389 (Extended Data Fig. 3a-af). Consistent with our previous work using AZD6738 (29) mice  
390 harboring PDX derived from ARMS showed the most pronounced response, with only  
391 one out of the seven ARMS PDX models classified as progressive disease after  
392 elimusertib treatment (Extended Data Fig. 3a-g) ERMS (Extended Data Fig. 3h-k) and  
393 MNA NB PDX (Extended Data Fig. 3w-aa) also showed a good response, with only one  
394 and two models with progressive disease, respectively. Interestingly, the ERMS model  
395 derived from a later relapse showed a better response than the models derived from the  
396 same patient at an earlier timepoint (ERMS\_2a and EMRS\_2b, respectively; Fig. 2b-c,  
397 Extended Data Fig. 3i-k), implicating that treatment-associated tumor evolution may have  
398 enhanced ATR inhibitor sensitivity. Toxicity, assessed by body weight loss over time,  
399 was minimal during treatment, indicating a good tolerability of the drug in the given  
400 regimen (Extended Data Fig. 4a-af). Together, elimusertib monotherapy has clinically  
401 relevant anti-tumor activity in pediatric solid tumor models.

402

#### 403 ***Elimusertib treatment extends progression-free survival in pediatric solid tumor models***

404 In order to further evaluate the preclinical activity of elimusertib, we assessed the  
405 progression-free survival (PFS) of PDX after elimusertib treatment. Overall, elimusertib  
406 extended the median PFS from 7 to 20 days across PDX models from different tumor  
407 entities (Fig. 3a). The most pronounced extension of PFS was observed for ARMS (Fig.  
408 3b, median PFS from 9 days to the end of experiment), followed by ERMS (Fig. 3c,  
409 median PFS from 5 to 26 days). Median PFS increased from 7 to 14 days for EWS (Fig.  
410 3d), from 6 to 12 days for MNA NB (Fig. 3e), 7 days to 17 for NMNA NB (Fig. 3f), 9 to  
411 20 days for OS (Fig. 3g) and 5 to 12 days for the CIC-DUX model (Fig. 3h). Furthermore,  
412 elimusertib prolonged overall survival across PDX from all tumor entities with a median  
413 overall survival of 19 days vs. 31 days in the untreated and elimusertib-treated group,

414 respectively (Extended Data Figure 5a). For some tumor entities, such as ARMS, ERMS,  
415 NMNA NB, and OS, the overall survival rate in the treatment group was significantly  
416 higher than the control group at 30 days, exceeding 75% overall survival (Extended data  
417 Fig. 5b, c, f, g). MNA NB and EWS also showed significantly prolonged overall survival,  
418 whereas the overall survival of the CIC-DUX models was not statistically significant  
419 (Extended data figure 5d, e, h). Thus, elimusertib monotherapy delays tumor growth,  
420 which results in pronounced increases in PFS and overall survival in diverse pediatric  
421 solid tumor models.

422

423 ***Reduced proliferation rate in pediatric solid tumor PDX after elimusertib treatment***  
424 ***represents a putative response biomarker***

425 To characterize the effect of elimusertib treatment on PDX, we performed  
426 immunohistochemical (IHC) staining of molecular markers of cell proliferation, DNA  
427 damage and apoptosis in 21 of the 32 PDX models at the end of elimusertib treatment  
428 (Extended Data Fig. 6, 7, 8, 9 & 10; Extended Data Table 4, 5 & 6). Baseline expression  
429 of these markers was not associated with differences in elimusertib response (Extended  
430 Data Fig. 11a, c-d). Only high pre-treatment Histone H3 phosphorylation (pHH3)  
431 expression, indicative of mitotic cells, was slightly associated (not statistically  
432 significant) with good PDX response (Extended data fig 11b). The fraction of Ki-67  
433 positive cells, an indicator of proliferating cells, in PDX was significantly lower in  
434 elimusertib- than vehicle-treated PDX (Fig. 4a-b), in line with the reduced cell  
435 proliferation observed after elimusertib treatment *in vitro* (Fig. 1). Notably, favorable  
436 response to elimusertib treatment, as defined using the RECIST criteria, was associated  
437 with low fractions of Ki-67 expressing cells after treatment (overall responding PDX,  
438 OR, composed of SD, PR and CR, Fig. 4c). In contrast, in poorly responding PDX, i.e.

439 with progressive disease (PD), differences in Ki-67 staining after elimusertib treatment  
440 were not significant (Fig. 4d-i). Similarly, Histone H3 phosphorylation, a marker of  
441 mitosis, was lower after elimusertib treatment in 8 out of 9 PDXs classified as responsive  
442 (OR, Extended Data fig. 10a-h). Thus, reduced cell proliferation is more pronounced in  
443 PDXs responsive to elimusertib. In addition, PDXs were stained for histone variant  
444  $\gamma$ H2A.X Ser139 phosphorylation ( $\gamma$ H2AX), a marker of DNA damage, and cleaved  
445 caspase-3 (C1c3), a marker of apoptosis. In contrast to our *in vitro* results, no significant  
446 differences in H2A.X Ser139 phosphorylation or caspase-3 cleavage were observed in  
447 PDXs treated with elimusertib compared to vehicle-treated PDXs (Extended Data Fig.  
448 10i-x). This may be because DNA damage induction and apoptosis precede reduced cell  
449 proliferation in tumors, hence was not detectable at the end of the treatment period. Thus,  
450 reduced Ki-67 expression, indicative of altered tumor cell proliferation, positively  
451 correlates with elimusertib response *in vivo* and may serve as a response marker in future  
452 clinical trials in which serial biopsies are performed.

453

454 ***Elimusertib outperforms standard of care treatment in a subset of preclinical pediatric***  
455 ***solid tumor models***

456 Pediatric solid tumors are currently treated with a combination of chemotherapeutic  
457 agents. In order to evaluate the clinical potential of elimusertib, we aimed to compare the  
458 anti-tumor effects of elimusertib in our cohort of PDXs with the effects of current SoC  
459 agents. Despite minor differences in exact composition, most pediatric tumors in Europe  
460 and the United States are treated in the first line with a combination of topoisomerase  
461 inhibitors, mitotic inhibitors, antimetabolites, intercalating and alkylating agents (55-58).  
462 The response to the abovementioned chemotherapeutic agents was evaluated using  
463 modified RECIST criteria and is also reported in a separate study, in which the detailed

464 molecular features of the PDX used here are presented (Xu et al., currently under  
465 consideration elsewhere). We here compared the responses to the SoC chemotherapeutics  
466 with the response to elimusertib (Fig. 5a). Notably, most PDXs were relatively  
467 unresponsive to SoC chemotherapeutics as monotherapy, which was not associated with  
468 prior exposure to these treatments in patients from which PDX were derived. Intriguingly,  
469 some of the PDXs that were relatively chemo-resistant responded well to elimusertib,  
470 indicating that patients that develop resistance to current SoC treatments may still benefit  
471 from elimusertib treatment (Fig. 5). We next compared the changes in PFS following  
472 elimusertib treatment to that of SoC chemotherapeutic agents (Fig. 5b-f). Strikingly,  
473 elimusertib prolonged the PFS of all ARMS and NMNA NB PDX to a greater extent than  
474 any of the SoC agents (Fig. 5). A similarly pronounced prolonged PFS advantage was  
475 observed compared to most chemotherapeutic agents tested in ERMS and MNA NB  
476 PDX. Only EWS PDX responded similarly to elimusertib as they did to chemotherapy.  
477 Thus, our in-depth preclinical response evaluation suggests that elimusertib could have  
478 clinically relevant anti-tumor effects in many pediatric tumor entities and may in some  
479 cases be superior to currently used treatment options.

480

481 ***Standard of care treatment-associated genomic evolution reveals candidate alterations***  
482 ***that render PDXs susceptible to ATR inhibition***

483 As shown *in vitro* (Fig. 1m) and suggested by previous reports (22-28,30), distinct  
484 molecular alterations may predict good response to ATR inhibitors. We genetically  
485 characterized a subset of the PDX models using whole exome sequencing (results  
486 reported in detail in Xu et al., currently under consideration elsewhere). None of the  
487 genetic alterations identified in our cohort were associated with therapy response across  
488 all or within different entities (Fig. 6a-f). Thus, we focused our analysis on genetic

489 alterations in otherwise near-isogenic PDX pairs derived from the same patients with  
490 particularly strong elimusertib response differences (Fig. 6g-h). For example, three  
491 ERMS PDX (ERMS\_2a-c) derived from subsequent relapses responded very differently  
492 to elimusertib, with the best response observed in the PDX derived from the latest relapse  
493 (ERMS\_2c, Fig. 6b, Extended Data Fig. 3i-k). Intriguingly, mutations in *BRCA1* and  
494 *FGFR4* were only detected in the responsive PDX (ERMS\_2c) and not in the two PDX  
495 derived from earlier clinical timepoints (ERMS\_2a+b), suggesting that these mutations  
496 occurred later during patient treatment. *BRCA1* deficiency has been implicated in ATR  
497 inhibitor response in the past (59,60), suggesting that the improved elimusertib response  
498 in the PDX may in part be due to the *de novo BRCA1* mutation. Furthermore ERMS\_2b  
499 acquired a mutation in *SETD2* during SoC treatment, which has been shown to enhance  
500 sensitivity to ATR inhibition in other tumor entities (30). Additionally, we examined two  
501 EWS PDX derived from the same patient (EWS\_3a+b). The first model (EWS\_3a) was  
502 established at diagnosis, whereas the second PDX (EWS\_3b) was established from the  
503 same patient after neo-adjuvant chemotherapy. Strikingly, the second sample responded  
504 better to elimusertib (Fig. 6c, Extended Data Fig. 3n-o), indicating that changes during  
505 neo-adjuvant chemotherapy may have enhanced susceptibility to elimusertib.  
506 Interestingly, many focal oncogene amplifications (e.g. *MYC*, *CCND1*, *MYCN*, *MDM2*)  
507 were detectable in EWS\_3b but not EWS\_3a (Fig. 6c). In line with previous reports  
508 (27,28) and our *in vitro* data (Fig. 1m), *MYCN* was one of the oncogenes mostly amplified  
509 in the responsive PDX (Fig. 6a,c). Gene amplifications can arise as a result of genomic  
510 instability and can occur in linear or extrachromosomal form (i.e. ecDNA). This raises  
511 the possibility that genomic instability and/or the type of gene amplification may  
512 influence ATR inhibitor sensitivity.

513

514 **Discussion**

515 Through an in-depth preclinical assessment of elimusertib's anti-tumor activity in a broad  
516 spectrum of patient-derived pediatric solid tumor models *in vitro* and *in vivo*, we here  
517 demonstrate that pharmacological ATR inhibition represents a therapeutic strategy with  
518 high clinical potential.

519 We and others have previously shown that diverse ATR inhibitors exhibit preclinical  
520 activity against a subset of ARMS, rhabdoid tumors, OS, EWS, *MYCN*-amplified  
521 neuroblastomas and medulloblastomas (24-26,28,29,61), but most of these studies only  
522 tested a small number of preclinical models and used ATR inhibitors that are currently  
523 not being clinically developed for the use in pediatric patients. In line with our results,  
524 the anti-tumor activity of different clinical-stage ATR inhibitors as monotherapy and in  
525 combination with other agents has been widely recognized in cancers in adults  
526 (21,22,26,38,48,59,62-64).

527 In contrast to most ATR inhibitors, elimusertib is still in clinical development both for  
528 adult and pediatric patients (NCT04095273, NCT04616534, NCT04514497,  
529 NCT05071209). Elimusertib's activity in most pediatric tumor entities, however, has not  
530 been assessed comprehensively to date. In an attempt to fill this gap of knowledge, we  
531 here performed a preclinical trial using state-of-the art preclinical patient-derived  
532 xenografts and broad molecular characterizations, similar to those performed by research  
533 consortia like the Pediatric Preclinical Testing Consortium. Compared to previous studies  
534 examining the anti-tumor activity ATR inhibitors in small numbers of *in vivo* models, our  
535 study provides insights on the inter-tumor response heterogeneity. The response  
536 heterogeneity observed in our study mirrors that of many clinical trials for small  
537 molecules, suggesting that preclinical trials of this scale may predict clinical responses  
538 more closely than preclinical testing using low number of *in vivo* models. High costs of

539 preclinical trials at this scale remain one of the main limitations of such studies. However,  
540 we propose that preclinical trials at similar scale as the one performed here should be  
541 considered as a standard for preclinical assessments in pediatric oncology.

542 Previous preclinical trials for various therapeutic interventions conventionally did not  
543 compare the effects of the tested intervention to standard of care (SoC) drugs. In fact,  
544 very little preclinical data exists for the anti-tumor efficacy of SoC drugs in preclinical  
545 patient-derived pediatric tumor models. This is mainly due to the fact that such models  
546 were not available to the same extent at the time SoC drugs were first selected for clinical  
547 testing. This raises several important questions. Even though many of the same SoC drugs  
548 are now considered the clinical gold standard for the treatment of different pediatric  
549 patients suffering from molecularly diverse tumor entities, we currently do not know how  
550 these SoC drugs perform preclinically. This lack of a true benchmark in preclinical trials  
551 creates problems when evaluating the efficacy of new treatment modalities. What anti-  
552 tumor effect should we consider as a positive result without such a benchmark? Do we  
553 currently set the bar too low or too high for new treatment modalities to be considered  
554 successful preclinically? To address these important limitations, we here compared the  
555 anti-tumor activity of elimusertib to that of SoC monotherapy in the same PDX models.  
556 This revealed that SoC drugs perform surprisingly poor in many PDX when assessing  
557 response using clinically relevant read outs and raises the question whether the same  
558 drugs would pass the threshold to be approved for clinical testing nowadays. For more  
559 details on the molecular profiles and SoC responses of the PDX cohort used here, we refer  
560 to a separate publication from our group (Xu et al., currently under consideration  
561 elsewhere). We here compared the response to SoC drugs to that of elimusertib, a small  
562 molecule inhibitor that very recently entered clinical testing in pediatric patients  
563 (NCT05071209). Notably, we observe that elimusertib outperformed most SoC agents in



564 most entities, particularly in ARMS. This is in line with our previous reports describing  
565 the exquisite sensitivity of ARMS cells to ATR inhibition, which at least in part seem due  
566 to PAX3-FOXO1-induced replication stress (29). We propose that based on both our  
567 previous and current studies on ATR inhibitors, patients suffering from ARMS should be  
568 designated as a high-priority patient group in which ATR inhibitors should be tested  
569 clinically.

570 Biomarkers predicting clinical response to DDR inhibitors including ATR inhibitors are  
571 still scarce. One of the most widely used molecular response predictor used for ATR  
572 inhibitors is ATM deficiency (22). Although we cannot exclude that ATM was  
573 epigenetically or otherwise compromised, we did not observe an association between the  
574 molecular *ATM* status and sensitivity of PDX models to elimusertib (Fig. 6a-f). Our  
575 findings stand in line with current clinical trial data showing that a large fraction of  
576 patients with ATM deficiency does not respond to ATR inhibitors (33). This suggests that  
577 other factors contribute to ATR inhibitor sensitivity. MYCN has been proposed to induce  
578 replication stress and sensitize cells to ATR inhibition (26). In line with these reports,  
579 *MYCN*-amplified neuroblastoma PDX were amongst the most sensitive to elimusertib.  
580 We previously demonstrated that PAX3-FOXO1 expression can sensitize cells to ATR  
581 inhibition independent of MYCN expression (29). This raised the question if gene  
582 amplification or the type of amplification rather than high oncogene expression may  
583 affect ATR inhibitor response. In line with our previous reports, PDX derived from  
584 ARMS expressing PAX3-FOXO1, were the most sensitive to elimusertib. Others have  
585 reported that fusion oncogene expression in general can sensitize cells ATR inhibition  
586 (25,45). In our preclinical trial, however, neither EWS-FLI1-expressing EWS PDX nor  
587 CIC-DUX-expressing undifferentiated sarcoma PDX models responded particularly well  
588 to elimusertib. The lack of additional CIC-DUX-expressing undifferentiated sarcoma

589 models limits definitive conclusions on the responsiveness of these tumors to elimusertib.  
590 As for EWS, we included 8 PDX models in our preclinical trial, 5 of which progressed  
591 during elimusertib treatment. This is in stark contrast to the reported sensitivity of EWS  
592 cells to ATR inhibition (25,45). We cannot exclude, however, that the previously  
593 observed exceptional sensitivity of EWS was specific to the ATR inhibitors tested in these  
594 studies and that the chemical or pharmacologic properties of elimusertib influence its  
595 activity on EWS cells. Thus, we here provide evidence that ARMS and MYCN-amplified  
596 neuroblastomas are most sensitive to elimusertib both *in vitro* and *in vivo*, suggesting  
597 patients suffering from these tumor entities may profit from elimusertib treatment.  
598 In summary, elimusertib is active against preclinical patient-derived pediatric solid tumor  
599 models. This data supports the initiation of clinical trials with elimusertib in patients with  
600 MYCN-amplified neuroblastomas and ARMS, and also provides evidence that some  
601 tumor entities may not respond as well to elimusertib as previously expected.

602

### 603 **Acknowledgments**

604 We would like to express our gratitude to the patients and families for providing tumor  
605 samples to the PDX biobank of Charite – Universitätsmedizin Berlin. We thank  
606 Experimental Pharmacology & Oncology GmbH and iPATH.Berlin for their technical  
607 support. We want to thank Bayer for providing elimusertib and their financial support for  
608 conducting preclinical studies using that drug.

609

### 610 **References**

- 611 1. Steliarova-Foucher E, Colombet M, Ries LAG, Moreno F, Dolya A, Bray F, *et*  
612 *al.* International incidence of childhood cancer, 2001-10: a population-based  
613 registry study. *Lancet Oncol* 2017;**18**(6):719-31 doi 10.1016/S1470-  
614 2045(17)30186-9.

- 615 2. Siegel RL, Miller KD, Fuchs HE, Jemal A. Cancer statistics, 2022. *CA Cancer J*  
616 *Clin* 2022;**72**(1):7-33 doi 10.3322/caac.21708.
- 617 3. Suh E, Stratton KL, Leisenring WM, Nathan PC, Ford JS, Freyer DR, *et al.* Late  
618 mortality and chronic health conditions in long-term survivors of early-  
619 adolescent and young adult cancers: a retrospective cohort analysis from the  
620 Childhood Cancer Survivor Study. *Lancet Oncol* 2020;**21**(3):421-35 doi  
621 10.1016/S1470-2045(19)30800-9.
- 622 4. Ma X, Liu Y, Alexandrov LB, Edmonson MN, Gawad C, Zhou X, *et al.* Pan-  
623 cancer genome and transcriptome analyses of 1,699 paediatric leukaemias and  
624 solid tumours. *Nature* 2018;**555**(7696):371-6 doi 10.1038/nature25795.
- 625 5. Anderson ND, de Borja R, Young MD, Fuligni F, Rosic A, Roberts ND, *et al.*  
626 Rearrangement bursts generate canonical gene fusions in bone and soft tissue  
627 tumors. *Science* 2018;**361**(6405) doi 10.1126/science.aam8419.
- 628 6. Brodeur GM, Seeger RC, Schwab M, Varmus HE, Bishop JM. Amplification of  
629 N-myc in untreated human neuroblastomas correlates with advanced disease  
630 stage. *Science* 1984;**224**(4653):1121-4 doi 10.1126/science.6719137.
- 631 7. Schwab M, Ellison J, Busch M, Rosenau W, Varmus HE, Bishop JM. Enhanced  
632 expression of the human gene N-myc consequent to amplification of DNA may  
633 contribute to malignant progression of neuroblastoma. *Proc Natl Acad Sci U S A*  
634 1984;**81**(15):4940-4 doi 10.1073/pnas.81.15.4940.
- 635 8. Kim H, Nguyen NP, Turner K, Wu S, Gujar AD, Luebeck J, *et al.*  
636 Extrachromosomal DNA is associated with oncogene amplification and poor  
637 outcome across multiple cancers. *Nat Genet* 2020;**52**(9):891-7 doi  
638 10.1038/s41588-020-0678-2.
- 639 9. van Leen E, Bruckner L, Henssen AG. The genomic and spatial mobility of  
640 extrachromosomal DNA and its implications for cancer therapy. *Nat Genet*  
641 2022;**54**(2):107-14 doi 10.1038/s41588-021-01000-z.
- 642 10. Yi E, Chamorro Gonzalez R, Henssen AG, Verhaak RGW. Extrachromosomal  
643 DNA amplifications in cancer. *Nat Rev Genet* 2022 doi 10.1038/s41576-022-  
644 00521-5.
- 645 11. Hanahan D, Weinberg RA. Hallmarks of cancer: the next generation. *Cell*  
646 2011;**144**(5):646-74 doi 10.1016/j.cell.2011.02.013.
- 647 12. Cheng B, Pan W, Xing Y, Xiao Y, Chen J, Xu Z. Recent advances in DDR  
648 (DNA damage response) inhibitors for cancer therapy. *Eur J Med Chem*  
649 2022;**230**:114109 doi 10.1016/j.ejmech.2022.114109.
- 650 13. Gorgoulis VG, Vassiliou LV, Karakaidos P, Zacharatos P, Kotsinas A, Liloglou  
651 T, *et al.* Activation of the DNA damage checkpoint and genomic instability in  
652 human precancerous lesions. *Nature* 2005;**434**(7035):907-13 doi  
653 10.1038/nature03485.
- 654 14. Di Micco R, Fumagalli M, Cicalese A, Piccinin S, Gasparini P, Luise C, *et al.*  
655 Oncogene-induced senescence is a DNA damage response triggered by DNA  
656 hyper-replication. *Nature* 2006;**444**(7119):638-42 doi 10.1038/nature05327.
- 657 15. Halazonetis TD, Gorgoulis VG, Bartek J. An oncogene-induced DNA damage  
658 model for cancer development. *Science* 2008;**319**(5868):1352-5 doi  
659 10.1126/science.1140735.
- 660 16. Jackson SP, Bartek J. The DNA-damage response in human biology and disease.  
661 *Nature* 2009;**461**(7267):1071-8 doi 10.1038/nature08467.
- 662 17. Blackford AN, Jackson SP. ATM, ATR, and DNA-PK: The Trinity at the Heart  
663 of the DNA Damage Response. *Mol Cell* 2017;**66**(6):801-17 doi  
664 10.1016/j.molcel.2017.05.015.

- 665 18. Cimprich KA, Cortez D. ATR: an essential regulator of genome integrity.  
666 *Nature reviews Molecular cell biology* 2008;**9**(8):616-27 doi 10.1038/nrm2450.
- 667 19. Zeman MK, Cimprich KA. Causes and consequences of replication stress. *Nat*  
668 *Cell Biol* 2014;**16**(1):2-9 doi 10.1038/ncb2897.
- 669 20. López-Contreras AJ, Gutierrez-Martinez P, Specks J, Rodrigo-Perez S,  
670 Fernandez-Capetillo O. An extra allele of Chk1 limits oncogene-induced  
671 replicative stress and promotes transformation. *J Exp Med* 2012;**209**(3):455-61  
672 doi 10.1084/jem.20112147.
- 673 21. Gilad O, Nabet BY, Ragland RL, Schoppy DW, Smith KD, Durham AC, *et al.*  
674 Combining ATR suppression with oncogenic Ras synergistically increases  
675 genomic instability, causing synthetic lethality or tumorigenesis in a dosage-  
676 dependent manner. *Cancer Res* 2010;**70**(23):9693-702 doi 10.1158/0008-  
677 5472.CAN-10-2286.
- 678 22. Reaper PM, Griffiths MR, Long JM, Charrier JD, Maccormick S, Charlton PA,  
679 *et al.* Selective killing of ATM- or p53-deficient cancer cells through inhibition  
680 of ATR. *Nature chemical biology* 2011;**7**(7):428-30 doi 10.1038/nchembio.573.
- 681 23. Kok YP, Guerrero Llobet S, Schoonen PM, Everts M, Bhattacharya A,  
682 Fehrmann RSN, *et al.* Overexpression of Cyclin E1 or Cdc25A leads to  
683 replication stress, mitotic aberrancies, and increased sensitivity to replication  
684 checkpoint inhibitors. *Oncogenesis* 2020;**9**(10):88 doi 10.1038/s41389-020-  
685 00270-2.
- 686 24. Henssen AG, Reed C, Jiang E, Garcia HD, von Stebut J, MacArthur IC, *et al.*  
687 Therapeutic targeting of PGBD5-induced DNA repair dependency in pediatric  
688 solid tumors. *Science translational medicine* 2017;**9**(414) doi  
689 10.1126/scitranslmed.aam9078.
- 690 25. Nieto-Soler M, Morgado-Palacin I, Lafarga V, Lecona E, Murga M, Callen E, *et al.*  
691 Efficacy of ATR inhibitors as single agents in Ewing sarcoma. *Oncotarget*  
692 2016;**7**(37):58759-67 doi 10.18632/oncotarget.11643.
- 693 26. Roeschert I, Poon E, Henssen AG, Garcia HD, Gatti M, Giansanti C, *et al.*  
694 Combined inhibition of Aurora-A and ATR kinase results in regression of  
695 MYCN-amplified neuroblastoma. *Nat Cancer* 2021;**2**(3):312-26 doi  
696 10.1038/s43018-020-00171-8.
- 697 27. Murga M, Campaner S, Lopez-Contreras AJ, Toledo LI, Soria R, Montana MF,  
698 *et al.* Exploiting oncogene-induced replicative stress for the selective killing of  
699 Myc-driven tumors. *Nat Struct Mol Biol* 2011;**18**(12):1331-5 doi  
700 10.1038/nsmb.2189.
- 701 28. King D, Southgate HED, Roetschke S, Gravells P, Fields L, Watson JB, *et al.*  
702 Increased Replication Stress Determines ATR Inhibitor Sensitivity in  
703 Neuroblastoma Cells. *Cancers (Basel)* 2021;**13**(24) doi  
704 10.3390/cancers13246215.
- 705 29. Dorado Garcia H, Pusch F, Bei Y, von Stebut J, Ibanez G, Guillan K, *et al.*  
706 Therapeutic targeting of ATR in alveolar rhabdomyosarcoma. *Nat Commun*  
707 2022;**13**(1):4297 doi 10.1038/s41467-022-32023-7.
- 708 30. Zimmermann M, Bernier C, Kaiser B, Fournier S, Li L, Desjardins J, *et al.*  
709 Guiding ATR and PARP inhibitor combinations with chemogenomic screens.  
710 *Cell Rep* 2022;**40**(2):111081 doi 10.1016/j.celrep.2022.111081.
- 711 31. Arndt CAS. Sarcomas of Bone and Soft Tissues in Children and Adolescents.  
712 Cham: Cham: Springer International Publishing AG; 2020.
- 713 32. Timme N, Han Y, Liu S, Yosief HO, Garcia HD, Bei Y, *et al.* Small-Molecule  
714 Dual PLK1 and BRD4 Inhibitors are Active Against Preclinical Models of

- 715 Pediatric Solid Tumors. *Transl Oncol* 2020;**13**(2):221-32 doi  
716 10.1016/j.tranon.2019.09.013.
- 717 33. Yap TA, Tan DSP, Terbuch A, Caldwell R, Guo C, Goh BC, *et al.* First-in-  
718 Human Trial of the Oral Ataxia Telangiectasia and RAD3-Related (ATR)  
719 Inhibitor BAY 1895344 in Patients with Advanced Solid Tumors. *Cancer*  
720 *Discov* 2021;**11**(1):80-91 doi 10.1158/2159-8290.CD-20-0868.
- 721 34. Casper AM, Nghiem P, Arlt MF, Glover TW. ATR regulates fragile site  
722 stability. *Cell* 2002;**111**(6):779-89 doi 10.1016/s0092-8674(02)01113-3.
- 723 35. McNees CJ, Tejera AM, Martínez P, Murga M, Mulero F, Fernandez-Capetillo  
724 O, *et al.* ATR suppresses telomere fragility and recombination but is dispensable  
725 for elongation of short telomeres by telomerase. *J Cell Biol* 2010;**188**(5):639-52  
726 doi 10.1083/jcb.200908136.
- 727 36. Kalsbeek D, Golsteyn RM. G2/M-Phase Checkpoint Adaptation and  
728 Micronuclei Formation as Mechanisms That Contribute to Genomic Instability  
729 in Human Cells. *Int J Mol Sci* 2017;**18**(11) doi 10.3390/ijms18112344.
- 730 37. Wengner AM, Siemeister G, Lücking U, Lefranc J, Wortmann L, Lienau P, *et*  
731 *al.* The Novel ATR Inhibitor BAY 1895344 Is Efficacious as Monotherapy and  
732 Combined with DNA Damage-Inducing or Repair-Compromising Therapies in  
733 Preclinical Cancer Models. *Mol Cancer Ther* 2020;**19**(1):26-38 doi  
734 10.1158/1535-7163.MCT-19-0019.
- 735 38. Szydzik J, Lind DE, Arefin B, Kurhe Y, Umapathy G, Siaw JT, *et al.* ATR  
736 inhibition enables complete tumour regression in ALK-driven NB mouse  
737 models. *Nat Commun* 2021;**12**(1):6813 doi 10.1038/s41467-021-27057-2.
- 738 39. Liu Q, Guntuku S, Cui XS, Matsuoka S, Cortez D, Tamai K, *et al.* Chk1 is an  
739 essential kinase that is regulated by Atr and required for the G(2)/M DNA  
740 damage checkpoint. *Genes Dev* 2000;**14**(12):1448-59.
- 741 40. Busino L, Chiesa M, Draetta GF, Donzelli M. Cdc25A phosphatase:  
742 combinatorial phosphorylation, ubiquitylation and proteolysis. *Oncogene*  
743 2004;**23**(11):2050-6 doi 10.1038/sj.onc.1207394.
- 744 41. Smith J, Tho LM, Xu N, Gillespie DA. The ATM-Chk2 and ATR-Chk1  
745 pathways in DNA damage signaling and cancer. *Adv Cancer Res* 2010;**108**:73-  
746 112 doi 10.1016/B978-0-12-380888-2.00003-0.
- 747 42. Prigent C, Dimitrov S. Phosphorylation of serine 10 in histone H3, what for? *J*  
748 *Cell Sci* 2003;**116**(Pt 18):3677-85 doi 10.1242/jcs.00735.
- 749 43. Santos-Pereira JM, Aguilera A. R loops: new modulators of genome dynamics  
750 and function. *Nat Rev Genet* 2015;**16**(10):583-97 doi 10.1038/nrg3961.
- 751 44. Boros-Olah B, Dobos N, Hornyak L, Szabo Z, Karanyi Z, Halmos G, *et al.*  
752 Drugging the R-loop interactome: RNA-DNA hybrid binding proteins as targets  
753 for cancer therapy. *DNA Repair (Amst)* 2019;**84**:102642 doi  
754 10.1016/j.dnarep.2019.102642.
- 755 45. Gorthi A, Romero JC, Loranc E, Cao L, Lawrence LA, Goodale E, *et al.* EWS-  
756 FLI1 increases transcription to cause R-loops and block BRCA1 repair in Ewing  
757 sarcoma. *Nature* 2018;**555**(7696):387-91 doi 10.1038/nature25748.
- 758 46. Gröbner SN, Worst BC, Weischenfeldt J, Buchhalter I, Kleinheinz K, Rudneva  
759 VA, *et al.* The landscape of genomic alterations across childhood cancers.  
760 *Nature* 2018;**555**(7696):321-7 doi 10.1038/nature25480.
- 761 47. Hustedt N, Álvarez-Quilón A, McEwan A, Yuan JY, Cho T, Koob L, *et al.* A  
762 consensus set of genetic vulnerabilities to ATR inhibition. *Open Biol*  
763 2019;**9**(9):190156 doi 10.1098/rsob.190156.



- 764 48. Williamson CT, Miller R, Pemberton HN, Jones SE, Campbell J, Konde A, *et al.* ATR inhibitors as a synthetic lethal therapy for tumours deficient in  
765 ARID1A. *Nat Commun* 2016;**7**:13837 doi 10.1038/ncomms13837.
- 766 49. DepMap, Broad (2021): DepMap 21Q2 Public. figshare. Dataset.  
767 <https://doi.org/10.6084/m9.figshare.14541774.v2>
- 768 50. Koche RP, Rodriguez-Fos E, Helmsauer K, Burkert M, MacArthur IC, Maag J,  
769 *et al.* Extrachromosomal circular DNA drives oncogenic genome remodeling in  
770 neuroblastoma. *Nat Genet* 2020;**52**(1):29-34 doi 10.1038/s41588-019-0547-z.
- 771 51. Helmsauer K, Valieva ME, Ali S, Chamorro Gonzalez R, Schopflin R, Roefzaad  
772 C, *et al.* Enhancer hijacking determines extrachromosomal circular MYCN  
773 amplicon architecture in neuroblastoma. *Nat Commun* 2020;**11**(1):5823 doi  
774 10.1038/s41467-020-19452-y.
- 775 52. Manzella G, Schreck LD, Breunis WB, Molenaar J, Merks H, Barr FG, *et al.*  
776 Phenotypic profiling with a living biobank of primary rhabdomyosarcoma  
777 unravels disease heterogeneity and AKT sensitivity. *Nat Commun*  
778 2020;**11**(1):4629 doi 10.1038/s41467-020-18388-7.
- 779 53. Eisenhauer EA, Therasse P, Bogaerts J, Schwartz LH, Sargent D, Ford R, *et al.*  
780 New response evaluation criteria in solid tumours: revised RECIST guideline  
781 (version 1.1). *Eur J Cancer* 2009;**45**(2):228-47 doi 10.1016/j.ejca.2008.10.026.
- 782 54. Schiavon G, Ruggiero A, Schöffski P, van der Holt B, Bekers DJ, Eechoute K,  
783 *et al.* Tumor volume as an alternative response measurement for imatinib treated  
784 GIST patients. *PLoS One* 2012;**7**(11):e48372 doi 10.1371/journal.pone.0048372.
- 785 55. Chen C, Dorado Garcia H, Scheer M, Henssen AG. Current and Future  
786 Treatment Strategies for Rhabdomyosarcoma. *Front Oncol* 2019;**9**:1458 doi  
787 10.3389/fonc.2019.01458.
- 788 56. Gill J, Gorlick R. Advancing therapy for osteosarcoma. *Nat Rev Clin Oncol*  
789 2021;**18**(10):609-24 doi 10.1038/s41571-021-00519-8.
- 790 57. Zollner SK, Amatruda JF, Bauer S, Collaud S, de Alava E, DuBois SG, *et al.*  
791 Ewing Sarcoma-Diagnosis, Treatment, Clinical Challenges and Future  
792 Perspectives. *J Clin Med* 2021;**10**(8) doi 10.3390/jcm10081685.
- 793 58. Moreno L, Barone G, DuBois SG, Molenaar J, Fischer M, Schulte J, *et al.*  
794 Accelerating drug development for neuroblastoma: Summary of the Second  
795 Neuroblastoma Drug Development Strategy forum from Innovative Therapies  
796 for Children with Cancer and International Society of Paediatric Oncology  
797 Europe Neuroblastoma. *Eur J Cancer* 2020;**136**:52-68 doi  
798 10.1016/j.ejca.2020.05.010.
- 799 59. Kim H, George E, Ragland R, Rafail S, Zhang R, Krepler C, *et al.* Targeting the  
800 ATR/CHK1 Axis with PARP Inhibition Results in Tumor Regression in. *Clin*  
801 *Cancer Res* 2017;**23**(12):3097-108 doi 10.1158/1078-0432.CCR-16-2273.
- 802 60. Yazinski SA, Comaills V, Buisson R, Genoie MM, Nguyen HD, Ho CK, *et al.*  
803 ATR inhibition disrupts rewired homologous recombination and fork protection  
804 pathways in PARP inhibitor-resistant BRCA-deficient cancer cells. *Genes Dev*  
805 2017;**31**(3):318-32 doi 10.1101/gad.290957.116.
- 806 61. Li X, Dean DC, Cote GM, Zou L, Hornicek FJ, Yu S, *et al.* Inhibition of ATR-  
807 Chk1 signaling blocks DNA double-strand-break repair and induces cytoplasmic  
808 vacuolization in metastatic osteosarcoma. *Ther Adv Med Oncol*  
809 2020;**12**:1758835920956900 doi 10.1177/1758835920956900.
- 810 62. Kwok M, Davies N, Agathangelou A, Smith E, Oldreive C, Petermann E, *et al.*  
811 ATR inhibition induces synthetic lethality and overcomes chemoresistance in  
812

- 813 TP53- or ATM-defective chronic lymphocytic leukemia cells. *Blood*  
814 2016;**127**(5):582-95 doi 10.1182/blood-2015-05-644872.
- 815 63. Lloyd RL, Wijnhoven PWG, Ramos-Montoya A, Wilson Z, Illuzzi G, Falenta  
816 K, *et al.* Combined PARP and ATR inhibition potentiates genome instability and  
817 cell death in ATM-deficient cancer cells. *Oncogene* 2020;**39**(25):4869-83 doi  
818 10.1038/s41388-020-1328-y.
- 819 64. Jette NR, Radhamani S, Arthur G, Ye R, Goutam S, Bolyos A, *et al.* Combined  
820 poly-ADP ribose polymerase and ataxia-telangiectasia mutated/Rad3-related  
821 inhibition targets ataxia-telangiectasia mutated-deficient lung cancer cells. *Br J*  
822 *Cancer* 2019;**121**(7):600-10 doi 10.1038/s41416-019-0565-8.

823

## 824 **Extended Data**

825 **Extended Data Figure 1.** Elimusertib represses cell cycle checkpoint activation and  
826 induces genomic instability.

827 **Extended Data Figure 2.** R-loop abundance does not correlate with therapy response to  
828 elimusertib in combined pediatric cancer cell lines.

829 **Extended Data Figure 3.** A cohort of pediatric solid tumor PDXs respond to elimusertib  
830 *in vivo*.

831 **Extended Data Figure 4.** Elimusertib treatment shows limited to no toxicity with regards  
832 to body weight development.

833 **Extended Data Figure 5.** Elimusertib treatment prolongs the overall survival of mice  
834 carrying pediatric solid tumors.

835 **Extended Data Figure 6.** Immunohistochemistry stainings of Ewing Sarcomas.

836 **Extended Data Figure 7.** Immunohistochemistry stainings of OS, ARMS and ERMS.

837 **Extended Data Figure 8.** Immunohistochemistry stainings of MNA and NMNA NB.

838 **Extended Data Figure 9.** Expression patterns of cell cycle, DNA damage and apoptosis  
839 markers change with elimusertib treatment.

840 **Extended Data Figure 10.** Ki-67 expression is reduced upon treatment with elimusertib  
841 in responding PDXs.

842 **Extended Data Figure 11.** Baseline IHC markers for proliferation, DNA damage and  
843 apoptosis show no correlation with relative tumor volume after treatment.

844 **Extended Data Table 1.** IC50 and AUC values of all used pediatric cancer cell lines.

845 **Extended Data Table 2.** PDX characterization with regards to tumor status, biopsy  
846 location, metastases, grading/staging, age and sex of the patients.

847 **Extended Data Table 3.** Statistical data for all tumor volume curves displayed in  
848 Extended Data Figure 3.

849 **Extended Data Table 4.** Quantifications of IHC markers in RMS.

850 **Extended Data Table 5.** Quantifications of IHC markers in EWS and OS\_1.

851 **Extended Data Table 6.** Quantifications of IHC markers in NB.



852 **Figures**

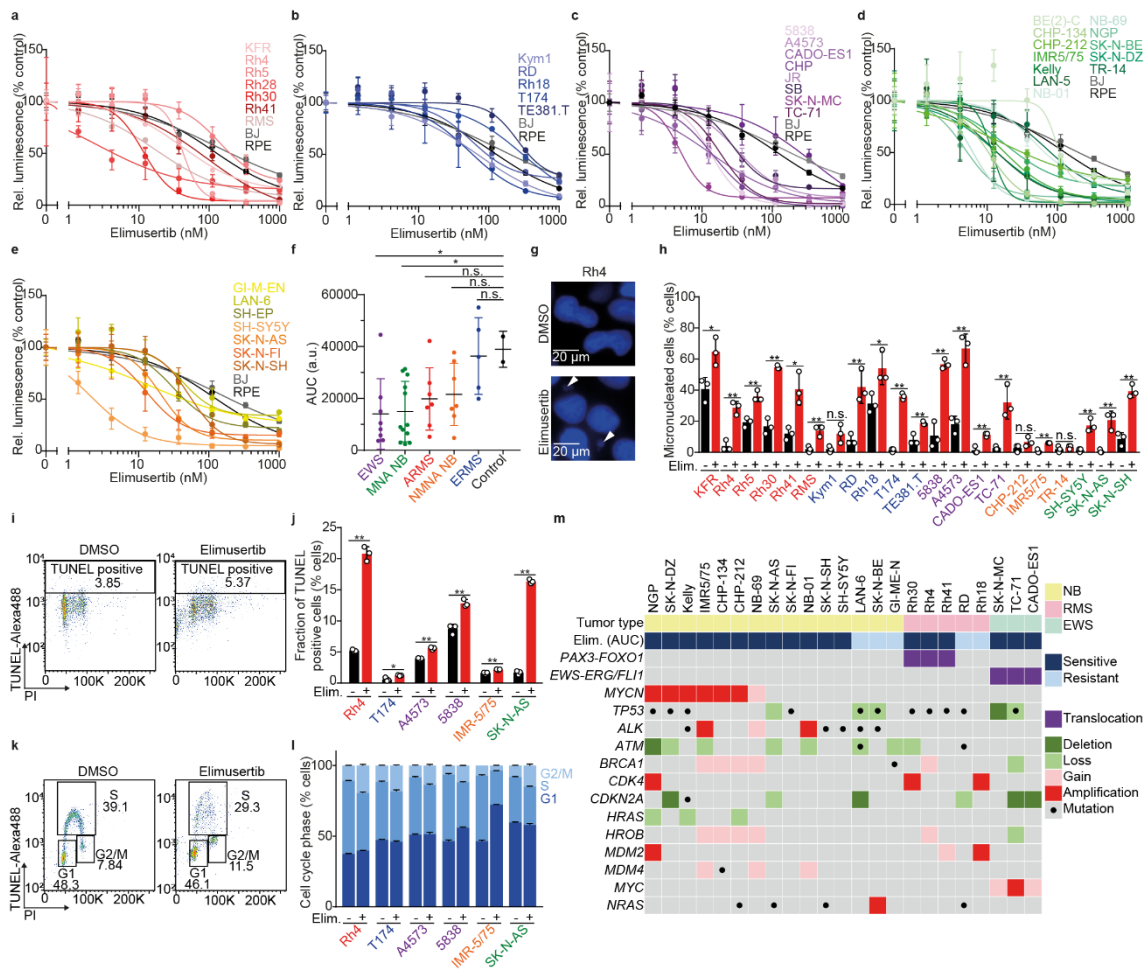

853

854 **Figure 1. Elimosertib shows anti-tumor activity in a broad spectrum of pediatric**  
 855 **cancer cell lines. (a-e)** Dose-response curves of the cell viability for ARMS (a), ERMS  
 856 (b), EWS (c), MNA NB (d) and NMNA NB cell lines (e) treated with the ATR inhibitor  
 857 elimosertib compared to non-cancer cell lines BJ and RPE ( $n = 3$ ; 50% inhibitory  
 858 concentrations,  $IC_{50}$ , and area under the curve, AUC, values are listed in Extended Data  
 859 Table 1). **(f)** AUC corresponding to the graphs in (a-e) (unpaired, two-sided Student's  $t$   
 860 test,  $P = 0.0410, 0.0165, 0.0761, 0.0992, 0.8260$  for EWS vs Control, MNA NB vs  
 861 Control, ARMS vs Control, NMNA NB vs Control, ERMS vs Control, respectively). **(g)**  
 862 Representative photomicrographs of micronuclei (white arrow) in cells treated with  
 863 elimosertib. **(h)** Fraction of micronucleated cells after treatment with elimosertib (20 nM)

864 for 72h ( $P = 0.0242, 0.0014, 0.0033, 0.0002, 0.0108, 0.0065, 0.520, 0.0061, 0.0312,$   
865  $1.30 \times 10^{-5}, 0.0072, 0.0008, 0.0014, 0.0026, 0.0088, 0.1448, 0.0013, 0.3740, 0.0030,$   
866  $0.0042, 0.0008,$  respectively;  $n = 3$ , with 50 cells per replicate). **(i)** Representative gating  
867 for TUNEL labeling in 5838 cells. **(j)** Quantification of TUNEL signal in a set of pediatric  
868 solid tumor cell lines treated with elimusertib (20 nM) for 72h. ( $P = 2.08 \times 10^{-5}, 0.0232,$   
869  $0.0002, 0.0018, 0.0045, 6.38 \times 10^{-7},$  respectively;  $n = 3$ ). **(k)** Representative gating for EdU  
870 and PI co-staining in 5838 cells. **(l)** Quantification of the fraction of cells in each cell  
871 cycle phase in a set of pediatric solid tumor cell lines after elimusertib treatment (20 nM)  
872 for 72h ( $n = 3$ ; unpaired, two-sided Student's t test; error bars represent standard  
873 deviation). **(m)** Table of mutations (incl. translocations, single nucleotide variants, copy  
874 number alterations) affecting genes associated with ATR inhibitor sensitivity in a subset  
875 of cell lines tested.

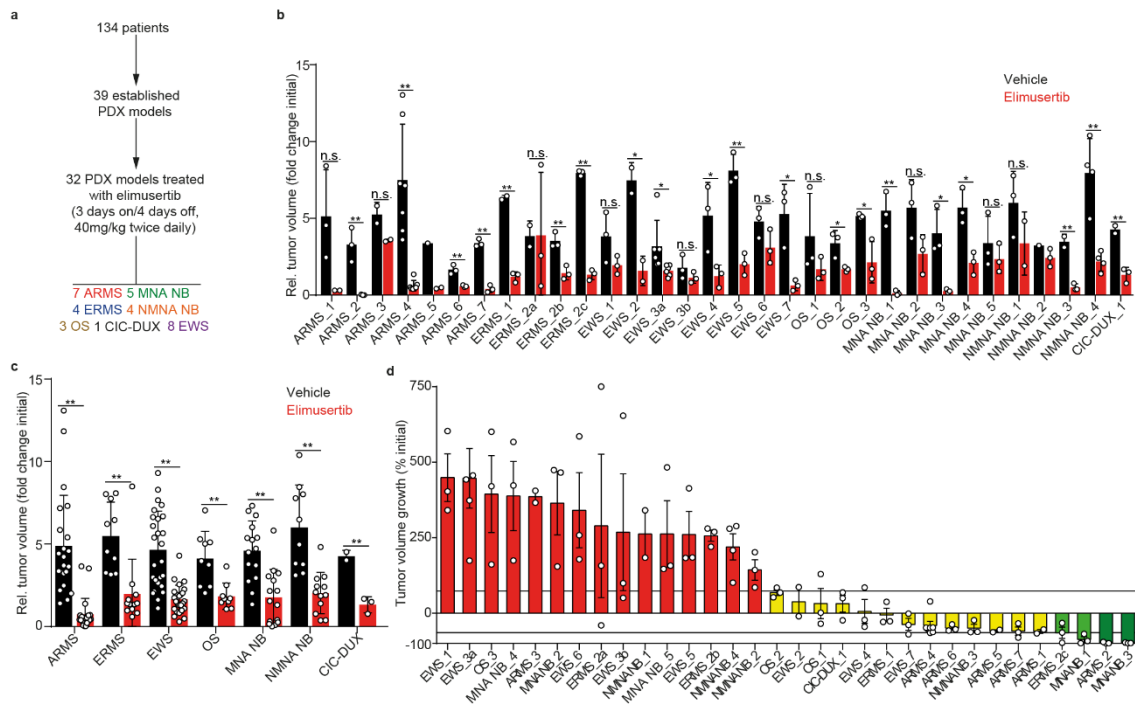

876

877 **Figure 2. Elimusertib treatment induces heterogeneous response in a large cohort of**

878 **patient-derived xenografts of pediatric solid tumors. (a)** Schematic representation of

879 the preclinical study in PDX models. A total of 39 PDX models were established from

880 134 patients. 32 of those PDXs received 40 mg/kg body weight elimusertib twice daily

881 per oral gavage, on a 3 days-on/4 days-off schedule. **(b)** Dot plot showing the relative

882 tumor volume at the end of the treatment for all PDXs treated with elimusertib or vehicle

883 control (*n* and *P* values are listed in Extended Data Table 3). **(c)** Dot plot showing the

884 relative tumor volume at the end of the treatment for all tumor entities treated with

885 elimusertib or vehicle control (*n* and *P* values are listed in Extended Data Table 3). **(d)**

886 Waterfall plot representing tumor volume change in mice receiving elimusertib. Tumors

887 were classified according to the RECIST criteria(54) as progressive disease (red), stable

888 disease (yellow), partial response (light green) and complete response (dark green). For

889 statistical comparison an unpaired, two-sided Student's *t* test was performed; error bars

890 represent standard deviation.

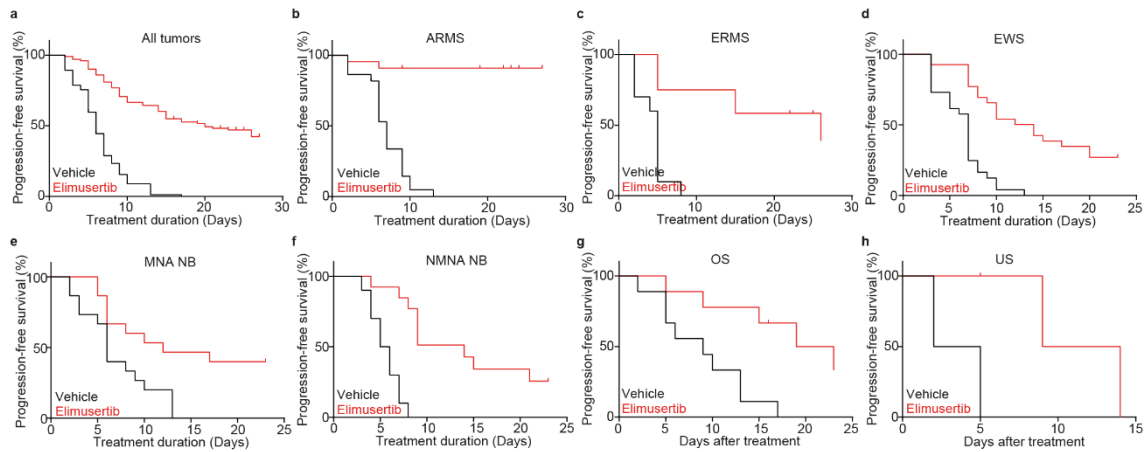

891

892 **Figure 3. Elimusertib treatment extends the progression-free survival of preclinical**

893 **pediatric solid tumor models. (a-h) Kaplan Meier curves showing the progression-free**

894 **survival, defined as time until the tumor was classified as progressive disease, PD,**

895 **according to the RECIST criteria, in mice treated with elimusertib (red) or vehicle (black),**

896 **across tumor types (a,  $n_{total} = 195$ ,  $P < 0.0001$ ), ARMS (b,  $n_{total} = 44$ ,  $P < 0.0001$ ), ERMS**

897 **(c,  $n_{total} = 22$ ,  $P = 0.0001$ ), EWS (d,  $n_{total} = 53$ ,  $P = < 0.0001$ ), MNA NB (e,  $n_{total} = 30$ ,  $P$**

898  **$= 0.0064$ ), NMNA NB (f,  $n_{total} = 23$ ,  $P < 0.0001$ ), OS (g,  $n_{total} = 18$ ,  $P = 0.0033$ ) and CIC-**

899 **DUX sarcoma (h,  $n_{total} = 5$ ,  $P = 0.0389$ ). Log-rank tests were performed for statistical**

900 **comparison.**

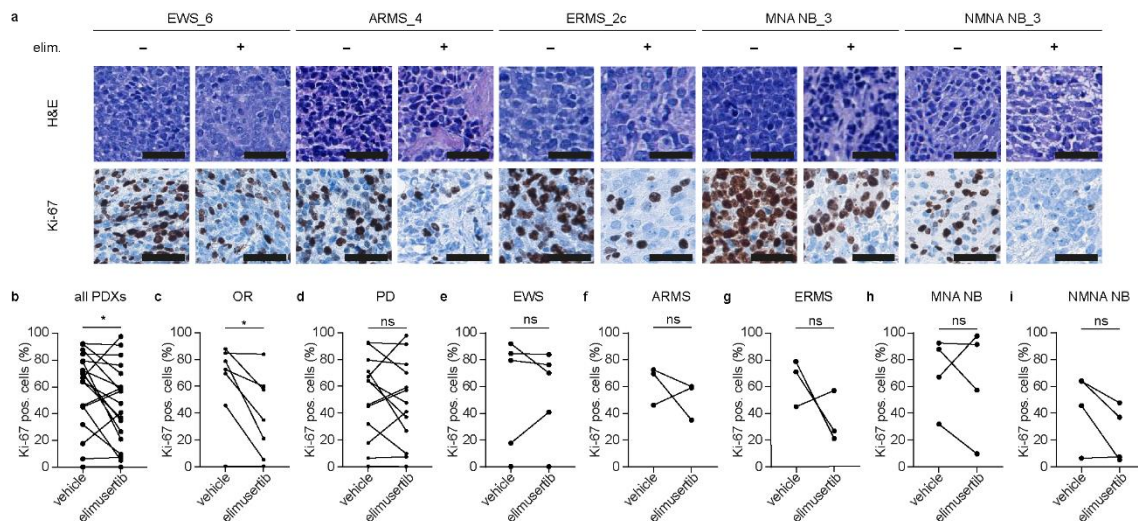

901

902 **Figure 4. Elimusertib reduces the proliferation rate in PDX models of pediatric solid**

903 **tumors. (a)** Exemplary H&E and Ki-67 stainings of EWS, ARMS, ERMS, MNA NB and

904 NMNA NB PDXs treated with elimusertib or vehicle control. **(b-i)** changes in the fraction

905 of Ki-67-expressing cells for all PDXs combined (b), PDXs responding to elimusertib as

906 defined per RECIST (OR, c) and PDXs with progressive disease (PD, d), EWS (e),

907 ARMS (f), ERMS (g), MNA NB (h) and NMNA NB (i). (n = 10; paired, two-sided

908 Student's t test; error bars represent standard deviation, P = 0.0371, 0.0216, 0.4764,

909 0.9394, 0.4935, 0.2945, 0.7005 and 0.0933 for all PDXs combined, responding PDXs,

910 PDXs with progressive disease, EWS, ARMS, ERMS, MNA NB and NMNA NB,

911 respectively). Scale bar = 40 μm.

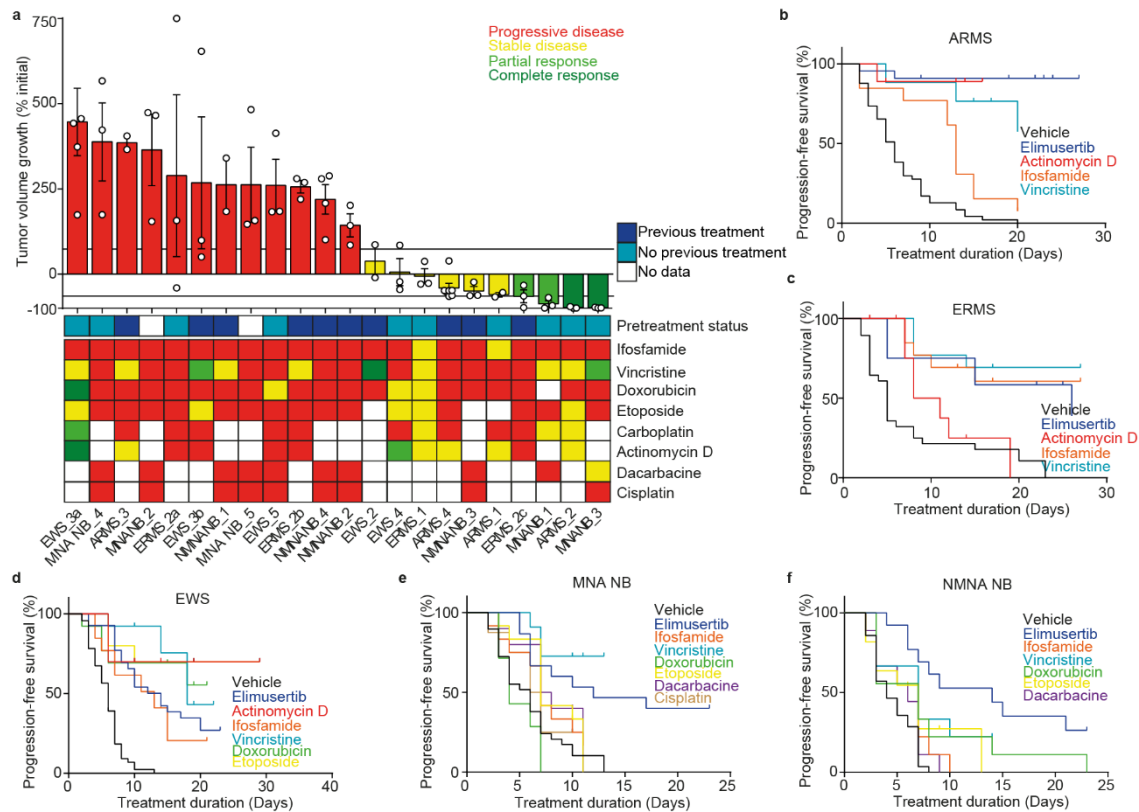

912

913 **Figure 5. Elimusertib is superior to standard of care treatment in a subset of**

914 **preclinical pediatric solid tumors models. (a) Representation of the tumor volume after**

915 **elimusertib treatment (top) and response to commonly used chemotherapeutic agents in**

916 **our cohort of PDX models according to the RECIST criteria in a heatmap (bottom,**

917 **progressive disease, red; stable disease, yellow; partial response, light green; complete**

918 **response, dark green;). In dark blue, PDX derived from patients that previously received**

919 **SoC treatment are marked.** (b-f) Kaplan Meier curves comparing the response of tumors

920 **to elimusertib, vehicle control treatment, or treatment with standard of care**

921 **chemotherapeutic agents for ARMS (b), ERMS (c), EWS (d), MNA NB (e), NMNA NB**

922 **(f).**

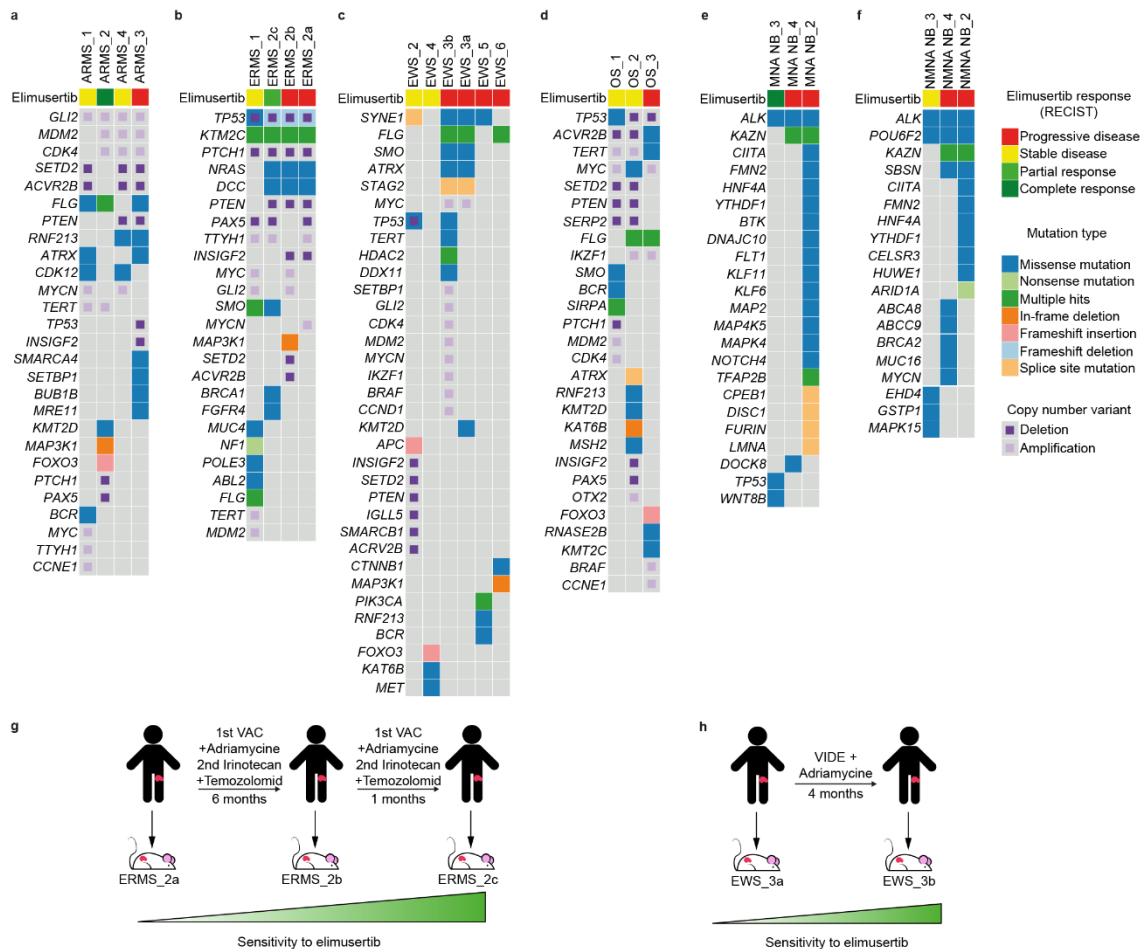

923

924 **Figure 6. Genomic tumor evolution reveal mutations that are associated with altered**

925 **response to elimusertib. (a-f)** Oncoplot showing mutations and CNVs present in PDX

926 models for ARMS (a), ERMS (b), EWS (c), OS (d), MNA NB (e) and NMNA NB (f).

927 **(g)** Timeline and chemotherapy treatment of a patient with ERMS and tumor response to

928 elimusertib of the corresponding PDXs. The first PDX was established from a primary

929 tumor. The patient received a cycle of vincristine, actinomycin D and cyclophosphamide

930 (VAC) complemented with low dosage of doxorubicine. A second line of treatment with

931 irinotecan and temozolomide was added later on. Six months after the first biopsy, a

932 biopsy from a relapsed tumor was used to establish a second PDX, and a new relapse after

933 one month was used for the third PDX. **(h)** Timeline and chemotherapy treatment of a

934 patient with EWS and tumor response to elimusertib of the corresponding PDXs. The first

935 PDX was established from a tumor biopsy used for diagnosis. The patient received a cycle



936 of vincristine, ifosfamide, doxorubicin and etoposide (VIDE) complemented with low  
937 dosage of doxorubicine. Four months after the initial biopsy, a biopsy from a relapsed  
938 tumor was used to establish a second PDX.
